# Supplementary material for: Identification of active sites and reaction mechanism on low-temperature SCR activity over Cu-SSZ-13 catalysts prepared by different methods
Source: Royal Society of Chemistry journal article supplement (doi:10.1039/c6cy00737f), 2016-01-01
Supplement: c6cy00737f1.pdf [file c6cy00737f1.pdf]

1 **Supporting Information**

2 **Identification of active sites and reaction mechanism on low-**  
3 **temperature SCR activity over Cu-SSZ-13 catalysts prepared by**  
4 **different methods**

5 Tao Zhang,<sup>†</sup> Feng Qiu,<sup>†</sup> Huazhen Chang,<sup>‡</sup> Xiang Li,<sup>†</sup> Junhua Li<sup>\*†</sup>

6 <sup>†</sup>State Key Joint Laboratory of Environment Simulation and Pollution Control, School of  
7 Environment, Tsinghua University, Beijing, 100084, China

8 <sup>‡</sup>School of Environment and Natural Resources, Renmin University of China, Beijing 100872,  
9 China

10  
11 \* Corresponding authors: Email address: [lijunhua@tsinghua.edu.cn](mailto:lijunhua@tsinghua.edu.cn)

12 Tel.: +86 10 62771093, fax: +86 10 62771093

13

14

15

16

17

18

19

20

21

1  
2  
3  
4  
5  
6  
7  
8

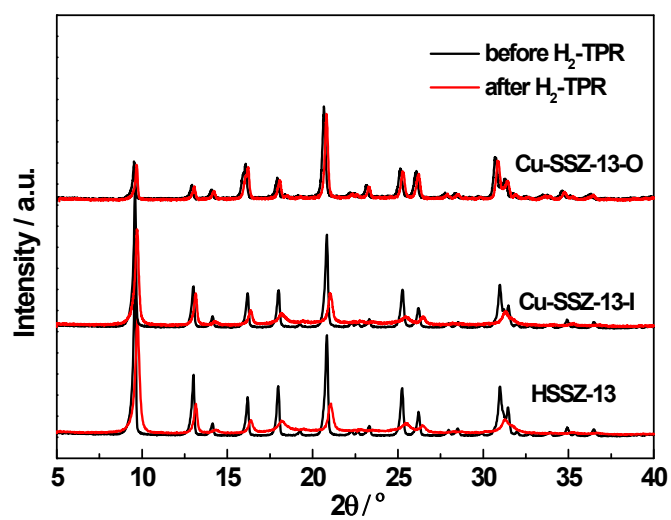

9

10 **Fig. S1.** XRD patterns of HSSZ-13, Cu-SSZ-13-I and Cu-SSZ-13-O before and after H<sub>2</sub>-TPR  
11 experiments.

12  
13  
14  
15  
16  
17  
18

1  
2  
3  
4  
5  
6

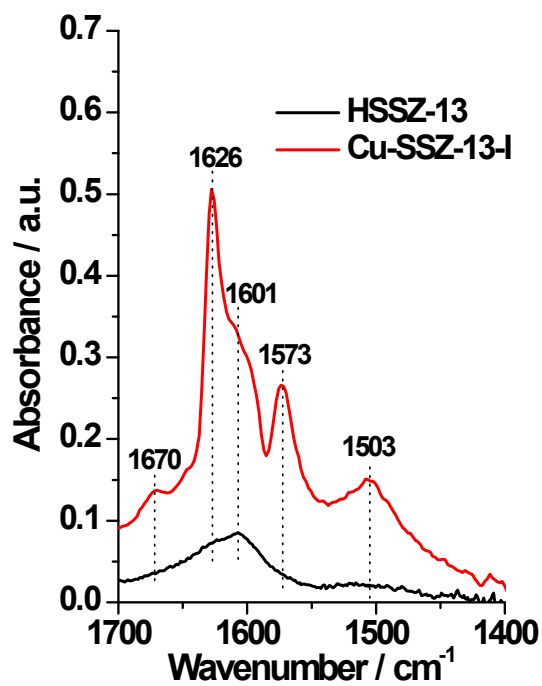

7

8 **Fig. S2.** DRIFTS spectra of chemisorbed 500 ppm NO + 5% O<sub>2</sub>/N<sub>2</sub> on HSSZ-13 and Cu-SSZ-

9 13-I at 100 °C.

10  
11  
12  
13  
14  
15

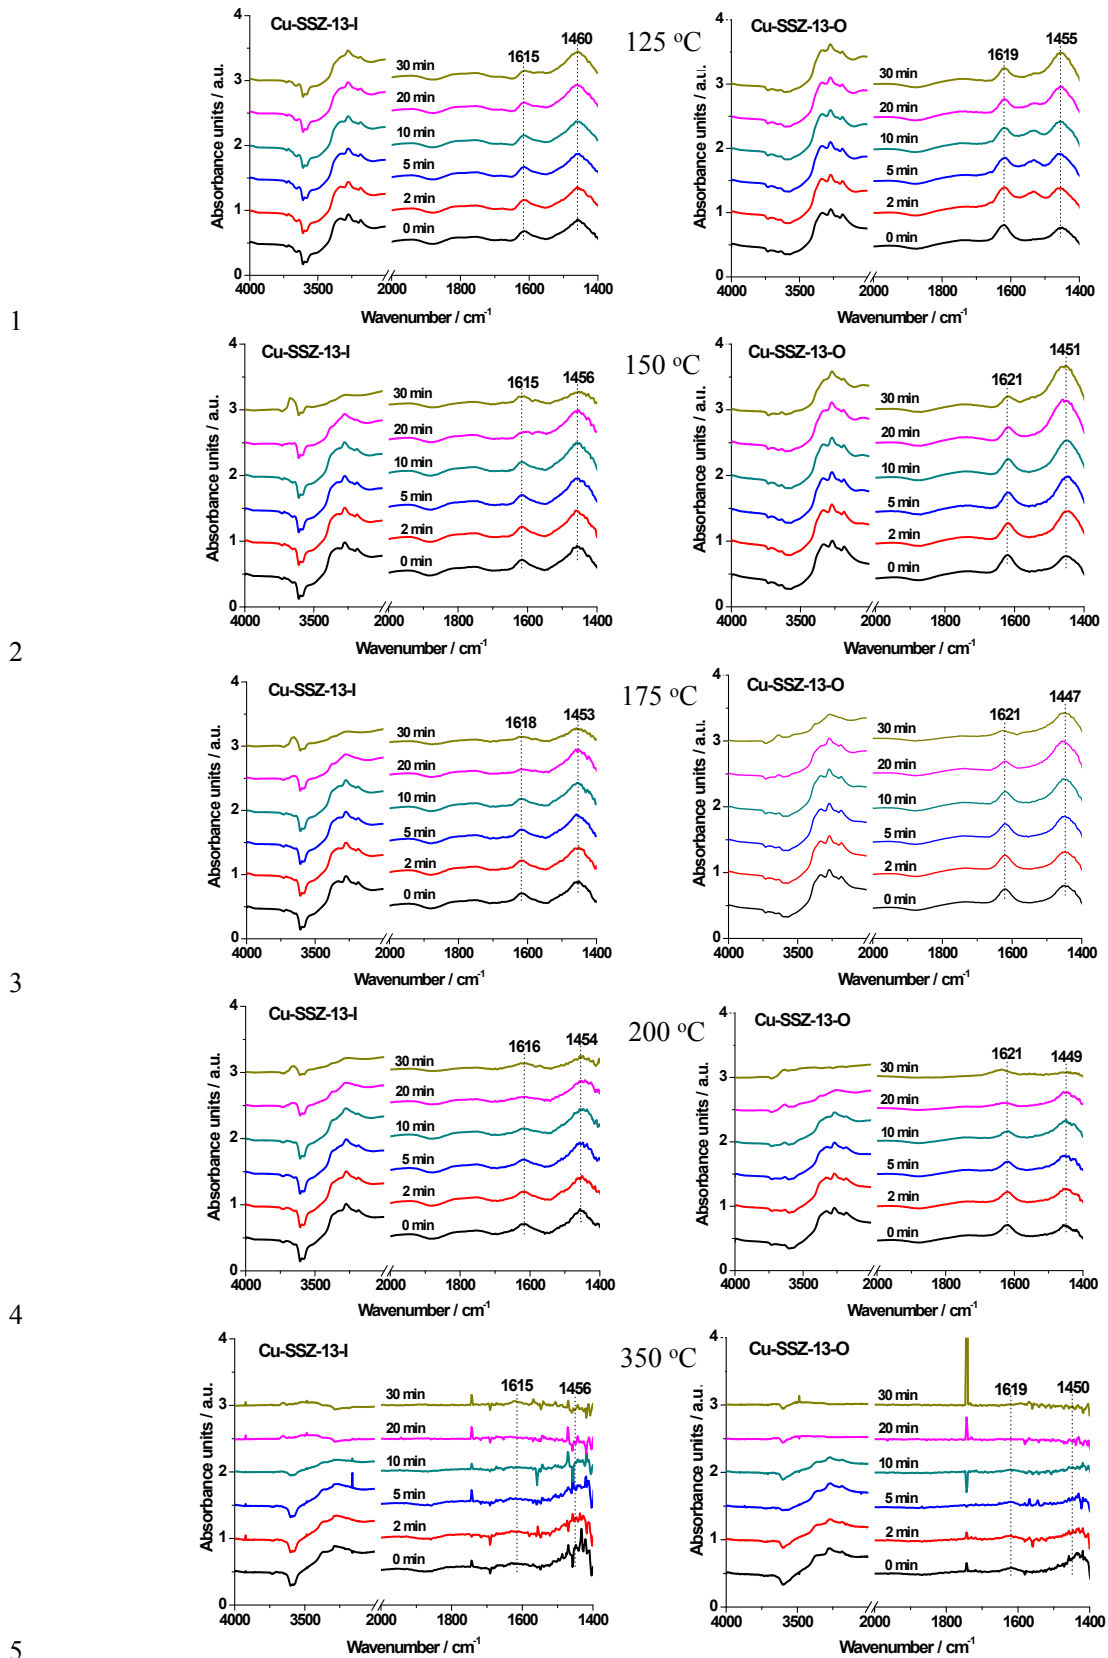

5  
6 **Fig. S3.** Consumption of coordinated  $\text{NH}_3$  (at approximately 1615 (1619)  $\text{cm}^{-1}$ ) and  $\text{NH}_4^+$  ions  
7 (at approximately 1460 (1451)  $\text{cm}^{-1}$ ) at different temperatures upon passing 500 ppm  $\text{NO}+5\%$   
8  $\text{O}_2/\text{N}_2$  over Cu-SSZ-13-I and Cu-SSZ-13-O with preadsorbed  $\text{NH}_3$ .

1

2

3

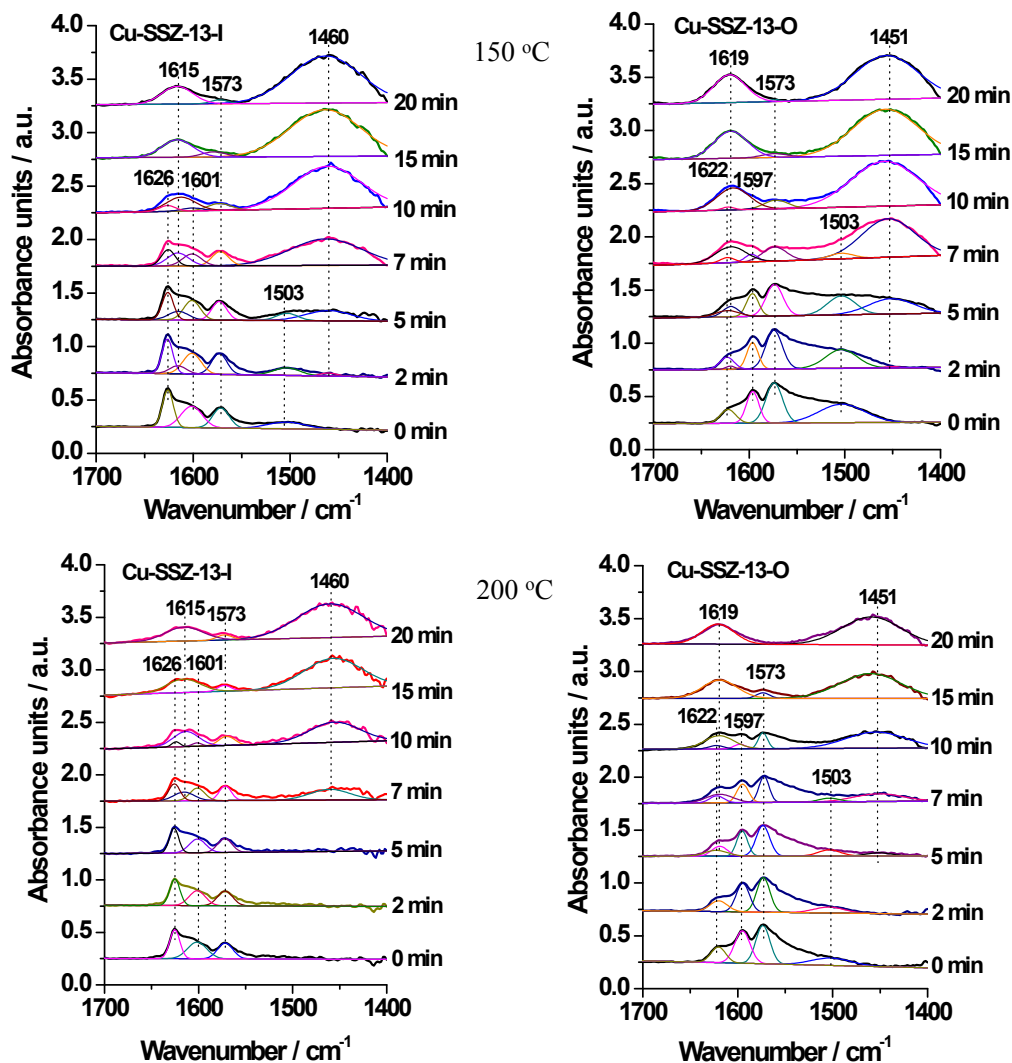

4

5

6 **Fig. S4.** Consumption of the adsorbed NO<sub>x</sub> species and generation of the adsorbed NH<sub>3</sub>  
7 species at 150 (a) and 200 °C (b) upon passing 500 ppm NH<sub>3</sub> over Cu-SSZ-13-I and Cu-SSZ-  
8 13-O with preadsorbed NO+O<sub>2</sub>.

9

10

11

12

1  
2  
3  
4  
5  
6  
7

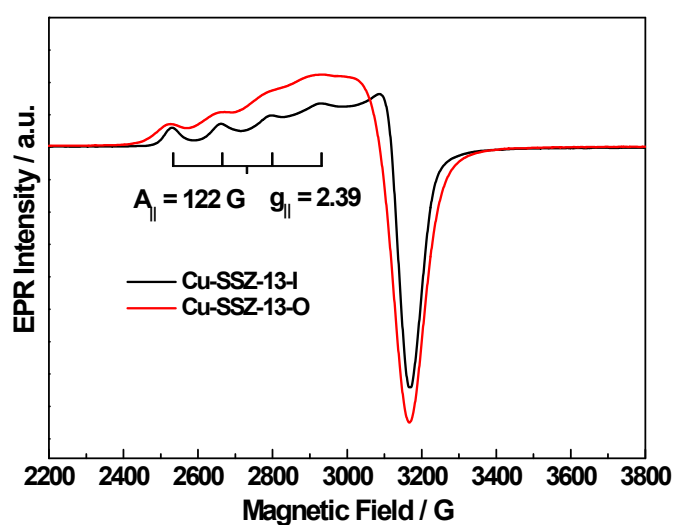

8  
9  
10  
11  
12  
13  
14  
15  
16  
17  
18

**Fig. S5.** EPR spectra of Cu-SSZ-13-I and Cu-SSZ-13-O measured at 123 K.

According to the EPR spectra and literature reports,<sup>1</sup> the EPR signals at  $g_{\parallel} = 2.39$  and  $A_{\parallel} = 122 \text{ G}$  on Cu-SSZ-13 catalyst could be ascribed to  $\text{Cu}^{2+}$  coordinated to three oxygen atoms on the six-ring sites.

## 1 References

- 2 1 L. Ma, Y. Cheng, G. Cavataio, R. W. McCabe, L. Fu and J. Li, *Chem. Eng. J.*, 2013, **225**,
- 3 323-330.
